# Supplementary material
Source: publisher figshare collection journal article supplement (https://karger.figshare.com/articles/dataset/_/6620348)
Supplement: Supplementary file 1 [file 1]

Archive with 8 entries (8 files):
- 490422_sm7.pdf
- 490422_sm8.pdf
- 490422_sm3.pdf
- 490422_sm2.pdf
- 490422_sm4.pdf
- 490422_sm1.pdf
- 490422_sm5.pdf
- 490422_sm6.pdf
